# Supplementary material for: Unravelling the origin of long-term stability for Cs+ and Sr2+ solidification inside sodalite
Source: Royal Society of Chemistry journal article supplement (doi:10.1039/d1cp04164a), 2022-01-01
Supplement: d1cp04164a1.pdf [file d1cp04164a1.pdf]

## Supporting Information

# Unraveling the Origin of Long-term Stability for Cs<sup>+</sup> and Sr<sup>2+</sup> Solidification inside Sodalite

Wenzhi Luo,<sup>1</sup> Xiaoqiang Yang,<sup>1</sup> Hailin Cao,<sup>2</sup> Luqian Weng,<sup>3</sup> Gang Feng<sup>4</sup>, Xian-Zhu Fu,<sup>1</sup> Jing-  
Li Luo<sup>1</sup>, Jianwen Liu <sup>1\*</sup>

<sup>1</sup> College of Materials Science and Engineering, Shenzhen University, Shenzhen, 518055, China

<sup>2</sup> College of Materials Science and Engineering, Harbin Institute of Technology, Shenzhen,  
518000, Peoples R China

<sup>3</sup> Shenzhen Aerospace New Materials Technology Cooperation, Shenzhen, Peoples R China

<sup>4</sup> Institute of Applied Chemistry, College of Chemistry, Nanchang University, No. 999 Xuefu  
Road, Nanchang 330031, P. R. China

**Table S1.** Lattice parameters for crystalline H<sub>2</sub>O, HNO<sub>3</sub>, NaNO<sub>3</sub>, CsNO<sub>3</sub> and Sr(NO<sub>3</sub>)<sub>2</sub>. The parameters for *a*, *b* and *c* are in angstrom (Å) and the *α*, *β* and *γ* are in degree (°).

| Substances                        | Crystalline                             |                                    |                                     |
|-----------------------------------|-----------------------------------------|------------------------------------|-------------------------------------|
|                                   | Substances                              | Lattice Parameters                 |                                     |
| H <sub>2</sub> O                  | H <sub>2</sub> O [1]                    | $a = b = 4.511, c = 7.351$         | $\alpha = \beta = 90, \gamma = 120$ |
| HNO <sub>3</sub>                  | HNO <sub>3</sub> ·3H <sub>2</sub> O [2] | $a = 9.485, b = 14.684, c = 3.436$ | $\alpha = \beta = \gamma = 90$      |
| NaNO <sub>3</sub>                 | NaNO <sub>3</sub> [3]                   | $a = b = 5.075, c = 17.070$        | $\alpha = \beta = 90, \gamma = 120$ |
| CsNO <sub>3</sub>                 | CsNO <sub>3</sub> [4]                   | $a = b = 10.902, c = 7.740$        | $\alpha = \beta = 90, \gamma = 120$ |
| Sr(NO <sub>3</sub> ) <sub>2</sub> | Sr(NO <sub>3</sub> ) <sub>2</sub> [5]   | $a = b = c = 7.822$                | $\alpha = \beta = \gamma = 90$      |

**Table S2.** The radii for different ions.

| <b>Ions</b>      | <b><i>Radius</i> [6]<br/>(Å)</b> |
|------------------|----------------------------------|
| H <sup>+</sup>   | 0.55                             |
| Na <sup>+</sup>  | 1.02                             |
| Cs <sup>+</sup>  | 1.67                             |
| Sr <sup>2+</sup> | 1.18                             |

**Table S3.** Exchange energies (in eV) for two possible configurations of  $\text{CsH}_5[\text{Si}_6\text{Al}_6\text{O}_{24}](\text{H}_2\text{O})_8$  and  $\text{SrH}_4[\text{Si}_6\text{Al}_6\text{O}_{24}](\text{H}_2\text{O})_8$ , respectively.

| $(\text{H}_2\text{O})_8$    | $E(\text{Cs}^+)$ | $E(\text{Sr}^{2+})$ |
|-----------------------------|------------------|---------------------|
| Configuration1 <sup>a</sup> | -419.60          | -418.84             |
| Configuration2 <sup>b</sup> | -419.43          | -418.79             |

<sup>a</sup> the configuration for three water molecules in the cage and five molecules out of the cage.

<sup>b</sup> the configuration for four water molecules in the cage and four molecules out of the cage.

**Table S4.** Exchange energies  $E_{EX}$  (eV) for  $\text{Cs}^+$  and  $\text{Sr}^{2+}$  ions with solvation water  $(\text{H}_2\text{O})_n$  ( $n=1-11$ ) in the cage of sodalite in acid environment.

| $(\text{H}_2\text{O})_n$ | $E_{EX}(\text{Cs}^+)$ | $E_{EX}(\text{Sr}^{2+})$ |
|--------------------------|-----------------------|--------------------------|
| $n = 0$                  | -0.47                 | 0.24                     |
| $n = 1$                  | -0.49                 | 0.21                     |
| $n = 2$                  | -1.25                 | -0.87                    |
| $n = 3$                  | -1.49                 | -1.15                    |
| $n = 4$                  | -1.74                 | -1.79                    |
| $n = 5$                  | -1.12                 | -1.36                    |
| $n = 6$                  | -0.6                  | -0.66                    |
| $n = 7$                  | -0.46                 | -0.17                    |
| $n = 8$                  | -1.05                 | -0.83                    |
| $n = 9$                  | -0.98                 | -1.41                    |
| $n = 10$                 | -0.43                 | -1.14                    |
| $n = 11$                 | 0.06                  | -0.27                    |

**Table S5.** Distances (in Å) for Cs<sup>+</sup> and Sr<sup>2+</sup> from the framework and H<sub>2</sub>O with minimal value structure in H-type.

| Ions                                                                                           | CsH <sub>5</sub> [Al <sub>6</sub> Si <sub>6</sub> O <sub>24</sub> ] | SrH <sub>4</sub> [Al <sub>6</sub> Si <sub>6</sub> O <sub>24</sub> ]                            |                              |
|------------------------------------------------------------------------------------------------|---------------------------------------------------------------------|------------------------------------------------------------------------------------------------|------------------------------|
| Cs-O <sub>Framework</sub> : 3.05                                                               |                                                                     | Sr-O <sub>Framework</sub> : 2.46                                                               |                              |
| Cs-O <sub>Framework</sub> : 3.60                                                               |                                                                     | Sr-O <sub>Framework</sub> : 2.87                                                               |                              |
| Cs-O <sub>Framework</sub> : 3.15                                                               |                                                                     | Sr-O <sub>Framework</sub> : 2.38                                                               |                              |
| Cs-O <sub>Framework</sub> : 3.59                                                               |                                                                     | Sr-O <sub>Framework</sub> : 2.71                                                               |                              |
| Cs-O <sub>Framework</sub> : 3.16                                                               |                                                                     | Sr-O <sub>Framework</sub> : 2.44                                                               |                              |
| Cs-O <sub>Framework</sub> : 3.56                                                               |                                                                     | Sr-O <sub>Framework</sub> : 2.22                                                               |                              |
| <b>CsH<sub>5</sub>[Al<sub>6</sub>Si<sub>6</sub>O<sub>24</sub>](H<sub>2</sub>O)<sub>1</sub></b> |                                                                     | <b>SrH<sub>4</sub>[Al<sub>6</sub>Si<sub>6</sub>O<sub>24</sub>](H<sub>2</sub>O)<sub>1</sub></b> |                              |
| Cs-O <sub>Framework</sub> : 3.95                                                               | Cs-O <sub>water</sub> : 3.10                                        | Sr-O <sub>Framework</sub> : 2.48                                                               | Sr-O <sub>water</sub> : 3.33 |
| Cs-O <sub>Framework</sub> : 4.44                                                               |                                                                     | Sr-O <sub>Framework</sub> : 2.98                                                               |                              |
| Cs-O <sub>Framework</sub> : 3.60                                                               |                                                                     | Sr-O <sub>Framework</sub> : 2.43                                                               |                              |
| Cs-O <sub>Framework</sub> : 3.33                                                               |                                                                     | Sr-O <sub>Framework</sub> : 2.85                                                               |                              |
| Cs-O <sub>Framework</sub> : 3.10                                                               |                                                                     | Sr-O <sub>Framework</sub> : 2.47                                                               |                              |
| Cs-O <sub>Framework</sub> : 4.08                                                               |                                                                     | Sr-O <sub>Framework</sub> : 3.06                                                               |                              |
| <b>CsH<sub>5</sub>[Al<sub>6</sub>Si<sub>6</sub>O<sub>24</sub>](H<sub>2</sub>O)<sub>2</sub></b> |                                                                     | <b>SrH<sub>4</sub>[Al<sub>6</sub>Si<sub>6</sub>O<sub>24</sub>](H<sub>2</sub>O)<sub>2</sub></b> |                              |
| Cs-O <sub>Framework</sub> : 3.01                                                               | Cs-O <sub>water</sub> : 2.99                                        | Sr-O <sub>Framework</sub> : 2.53                                                               | Sr-O <sub>water</sub> : 3.27 |
| Cs-O <sub>Framework</sub> : 3.43                                                               | Cs-O <sub>water</sub> : 3.05                                        | Sr-O <sub>Framework</sub> : 2.80                                                               | Sr-O <sub>water</sub> : 3.27 |
| Cs-O <sub>Framework</sub> : 3.00                                                               |                                                                     | Sr-O <sub>Framework</sub> : 2.45                                                               |                              |
| Cs-O <sub>Framework</sub> : 3.57                                                               |                                                                     | Sr-O <sub>Framework</sub> : 2.93                                                               |                              |
| Cs-O <sub>Framework</sub> : 3.65                                                               |                                                                     | Sr-O <sub>Framework</sub> : 2.55                                                               |                              |
| Cs-O <sub>Framework</sub> : 3.20                                                               |                                                                     | Sr-O <sub>Framework</sub> : 3.48                                                               |                              |
| <b>CsH<sub>5</sub>[Al<sub>6</sub>Si<sub>6</sub>O<sub>24</sub>](H<sub>2</sub>O)<sub>3</sub></b> |                                                                     | <b>SrH<sub>4</sub>[Al<sub>6</sub>Si<sub>6</sub>O<sub>24</sub>](H<sub>2</sub>O)<sub>3</sub></b> |                              |

|                                  |                             |                                  |                             |
|----------------------------------|-----------------------------|----------------------------------|-----------------------------|
| Cs-O <sub>Framework</sub> : 3.49 | Cs-O <sub>water</sub> :3.10 | Sr-O <sub>Framework</sub> : 2.46 | Sr-O <sub>water</sub> :3.24 |
| Cs-O <sub>Framework</sub> :3.04  | Cs-O <sub>water</sub> :3.05 | Sr-O <sub>Framework</sub> : 3.01 | Sr-O <sub>water</sub> :3.61 |
| Cs-O <sub>Framework</sub> :3.55  | Cs-O <sub>water</sub> :3.07 | Sr-O <sub>Framework</sub> : 2.50 | Sr-O <sub>water</sub> :3.63 |
| Cs-O <sub>Framework</sub> : 3.09 |                             | Sr-O <sub>Framework</sub> : 2.99 |                             |
| Cs-O <sub>Framework</sub> : 3.54 |                             | Sr-O <sub>Framework</sub> : 2.51 |                             |
| Cs-O <sub>Framework</sub> : 2.95 |                             | Sr-O <sub>Framework</sub> : 3.08 |                             |

---

**CsH<sub>5</sub>[Al<sub>6</sub>Si<sub>6</sub>O<sub>24</sub>](H<sub>2</sub>O)<sub>4</sub>**

**SrH<sub>4</sub>[Al<sub>6</sub>Si<sub>6</sub>O<sub>24</sub>](H<sub>2</sub>O)<sub>4</sub>**

|                                  |                             |                                  |                             |
|----------------------------------|-----------------------------|----------------------------------|-----------------------------|
| Cs-O <sub>Framework</sub> : 3.06 | Cs-O <sub>water</sub> :3.10 | Sr-O <sub>Framework</sub> : 2.55 | Sr-O <sub>water</sub> :3.10 |
| Cs-O <sub>Framework</sub> :3.61  | Cs-O <sub>water</sub> :2.80 | Sr-O <sub>Framework</sub> :3.27  | Sr-O <sub>water</sub> :3.57 |
| Cs-O <sub>Framework</sub> :3.09  | Cs-O <sub>water</sub> :3.16 | Sr-O <sub>Framework</sub> : 2.68 | Sr-O <sub>water</sub> :2.64 |
| Cs-O <sub>Framework</sub> : 3.55 | Cs-O <sub>water</sub> :5.13 | Sr-O <sub>Framework</sub> : 3.38 | Sr-O <sub>water</sub> :5.25 |
| Cs-O <sub>Framework</sub> : 2.99 |                             | Sr-O <sub>Framework</sub> : 2.54 |                             |
| Cs-O <sub>Framework</sub> : 3.49 |                             | Sr-O <sub>Framework</sub> : 2.89 |                             |

---

**CsH<sub>5</sub>[Al<sub>6</sub>Si<sub>6</sub>O<sub>24</sub>](H<sub>2</sub>O)<sub>5</sub>**

**SrH<sub>4</sub>[Al<sub>6</sub>Si<sub>6</sub>O<sub>24</sub>](H<sub>2</sub>O)<sub>5</sub>**

|                                  |                             |                                  |                             |
|----------------------------------|-----------------------------|----------------------------------|-----------------------------|
| Cs-O <sub>Framework</sub> : 3.04 | Cs-O <sub>water</sub> :3.12 | Sr-O <sub>Framework</sub> : 2.68 | Sr-O <sub>water</sub> :2.62 |
| Cs-O <sub>Framework</sub> :3.67  | Cs-O <sub>water</sub> :2.83 | Sr-O <sub>Framework</sub> : 3.32 | Sr-O <sub>water</sub> :3.10 |
| Cs-O <sub>Framework</sub> :3.07  | Cs-O <sub>water</sub> :3.16 | Sr-O <sub>Framework</sub> : 2.53 | Sr-O <sub>water</sub> :3.59 |
| Cs-O <sub>Framework</sub> : 3.50 | Cs-O <sub>water</sub> :5.17 | Sr-O <sub>Framework</sub> : 2.84 | Sr-O <sub>water</sub> :6.04 |
| Cs-O <sub>Framework</sub> : 3.09 | Cs-O <sub>water</sub> :5.16 | Sr-O <sub>Framework</sub> : 2.55 | Sr-O <sub>water</sub> :5.23 |
| Cs-O <sub>Framework</sub> : 3.44 |                             | Sr-O <sub>Framework</sub> : 3.38 |                             |

---

**CsH<sub>5</sub>[Al<sub>6</sub>Si<sub>6</sub>O<sub>24</sub>](H<sub>2</sub>O)<sub>6</sub>**

**SrH<sub>4</sub>[Al<sub>6</sub>Si<sub>6</sub>O<sub>24</sub>](H<sub>2</sub>O)<sub>6</sub>**

|                                  |                             |                                  |                             |
|----------------------------------|-----------------------------|----------------------------------|-----------------------------|
| Cs-O <sub>Framework</sub> : 3.72 | Cs-O <sub>water</sub> :3.13 | Sr-O <sub>Framework</sub> : 2.50 | Sr-O <sub>water</sub> :2.61 |
| Cs-O <sub>Framework</sub> :3.10  | Cs-O <sub>water</sub> :2.84 | Sr-O <sub>Framework</sub> : 3.25 | Sr-O <sub>water</sub> :3.13 |
| Cs-O <sub>Framework</sub> :3.47  | Cs-O <sub>water</sub> :3.15 | Sr-O <sub>Framework</sub> : 2.64 | Sr-O <sub>water</sub> :3.54 |
| Cs-O <sub>Framework</sub> : 3.04 | Cs-O <sub>water</sub> :5.33 | Sr-O <sub>Framework</sub> : 3.52 | Sr-O <sub>water</sub> :7.45 |
| Cs-O <sub>Framework</sub> : 3.43 | Cs-O <sub>water</sub> :5.29 | Sr-O <sub>Framework</sub> : 2.52 | Sr-O <sub>water</sub> :7.90 |
| Cs-O <sub>Framework</sub> : 3.02 | Cs-O <sub>water</sub> :8.28 | Sr-O <sub>Framework</sub> : 3.02 | Sr-O <sub>water</sub> :4.74 |

---

| <b>CsH<sub>5</sub>[Al<sub>6</sub>Si<sub>6</sub>O<sub>24</sub>](H<sub>2</sub>O)<sub>7</sub></b> |                             | <b>SrH<sub>4</sub>[Al<sub>6</sub>Si<sub>6</sub>O<sub>24</sub>](H<sub>2</sub>O)<sub>7</sub></b> |                             |
|------------------------------------------------------------------------------------------------|-----------------------------|------------------------------------------------------------------------------------------------|-----------------------------|
| Cs-O <sub>Framework</sub> : 3.81                                                               | Cs-O <sub>water</sub> :3.11 | Sr-O <sub>Framework</sub> : 2.57                                                               | Sr-O <sub>water</sub> :2.56 |
| Cs-O <sub>Framework</sub> :3.13                                                                | Cs-O <sub>water</sub> :2.85 | Sr-O <sub>Framework</sub> : 3.38                                                               | Sr-O <sub>water</sub> :3.57 |
| Cs-O <sub>Framework</sub> :3.47                                                                | Cs-O <sub>water</sub> :3.17 | Sr-O <sub>Framework</sub> : 2.57                                                               | Sr-O <sub>water</sub> :3.58 |
| Cs-O <sub>Framework</sub> : 3.10                                                               | Cs-O <sub>water</sub> :7.58 | Sr-O <sub>Framework</sub> : 2.96                                                               | Sr-O <sub>water</sub> :5.13 |
| Cs-O <sub>Framework</sub> : 3.49                                                               | Cs-O <sub>water</sub> :5.60 | Sr-O <sub>Framework</sub> : 2.47                                                               | Sr-O <sub>water</sub> :6.40 |
| Cs-O <sub>Framework</sub> : 3.08                                                               | Cs-O <sub>water</sub> :5.16 | Sr-O <sub>Framework</sub> : 3.07                                                               | Sr-O <sub>water</sub> :7.52 |
|                                                                                                | Cs-O <sub>water</sub> :4.71 |                                                                                                | Sr-O <sub>water</sub> :4.23 |
| <b>CsH<sub>5</sub>[Al<sub>6</sub>Si<sub>6</sub>O<sub>24</sub>](H<sub>2</sub>O)<sub>8</sub></b> |                             | <b>SrH<sub>4</sub>[Al<sub>6</sub>Si<sub>6</sub>O<sub>24</sub>](H<sub>2</sub>O)<sub>8</sub></b> |                             |
| Cs-O <sub>Framework</sub> : 3.03                                                               | Cs-O <sub>water</sub> :2.85 | Sr-O <sub>Framework</sub> : 2.61                                                               | Sr-O <sub>water</sub> :2.55 |
| Cs-O <sub>Framework</sub> :3.77                                                                | Cs-O <sub>water</sub> :3.14 | Sr-O <sub>Framework</sub> : 3.56                                                               | Sr-O <sub>water</sub> :3.39 |
| Cs-O <sub>Framework</sub> :3.14                                                                | Cs-O <sub>water</sub> :3.16 | Sr-O <sub>Framework</sub> : 2.68                                                               | Sr-O <sub>water</sub> :6.31 |
| Cs-O <sub>Framework</sub> : 3.40                                                               | Cs-O <sub>water</sub> :5.08 | Sr-O <sub>Framework</sub> : 3.12                                                               | Sr-O <sub>water</sub> :6.82 |
| Cs-O <sub>Framework</sub> : 3.11                                                               | Cs-O <sub>water</sub> :6.15 | Sr-O <sub>Framework</sub> : 2.57                                                               | Sr-O <sub>water</sub> :3.22 |
| Cs-O <sub>Framework</sub> : 3.53                                                               | Cs-O <sub>water</sub> :6.57 | Sr-O <sub>Framework</sub> : 3.15                                                               | Sr-O <sub>water</sub> :5.13 |
|                                                                                                | Cs-O <sub>water</sub> :4.50 |                                                                                                | Sr-O <sub>water</sub> :5.51 |
|                                                                                                | Cs-O <sub>water</sub> :5.58 |                                                                                                | Sr-O <sub>water</sub> :4.19 |
| <b>CsH<sub>5</sub>[Al<sub>6</sub>Si<sub>6</sub>O<sub>24</sub>](H<sub>2</sub>O)<sub>9</sub></b> |                             | <b>SrH<sub>4</sub>[Al<sub>6</sub>Si<sub>6</sub>O<sub>24</sub>](H<sub>2</sub>O)<sub>9</sub></b> |                             |
| Cs-O <sub>Framework</sub> : 2.99                                                               | Cs-O <sub>water</sub> :2.90 | Sr-O <sub>Framework</sub> : 2.43                                                               | Sr-O <sub>water</sub> :3.49 |
| Cs-O <sub>Framework</sub> :3.56                                                                | Cs-O <sub>water</sub> :3.31 | Sr-O <sub>Framework</sub> : 2.46                                                               | Sr-O <sub>water</sub> :3.86 |
| Cs-O <sub>Framework</sub> :2.94                                                                | Cs-O <sub>water</sub> :3.90 | Sr-O <sub>Framework</sub> : 2.46                                                               | Sr-O <sub>water</sub> :3.86 |
| Cs-O <sub>Framework</sub> : 3.39                                                               | Cs-O <sub>water</sub> :3.14 | Sr-O <sub>Framework</sub> : 2.81                                                               | Sr-O <sub>water</sub> :4.83 |
| Cs-O <sub>Framework</sub> : 3.14                                                               | Cs-O <sub>water</sub> :6.44 | Sr-O <sub>Framework</sub> : 2.98                                                               | Sr-O <sub>water</sub> :7.11 |
| Cs-O <sub>Framework</sub> : 3.84                                                               | Cs-O <sub>water</sub> :6.59 | Sr-O <sub>Framework</sub> : 3.02                                                               | Sr-O <sub>water</sub> :5.45 |
|                                                                                                | Cs-O <sub>water</sub> :4.85 |                                                                                                | Sr-O <sub>water</sub> :2.88 |
|                                                                                                | Cs-O <sub>water</sub> :7.13 |                                                                                                | Sr-O <sub>water</sub> :7.11 |
|                                                                                                | Cs-O <sub>water</sub> :4.26 |                                                                                                | Sr-O <sub>water</sub> :5.45 |



| <b>CsH<sub>5</sub>[Al<sub>6</sub>Si<sub>6</sub>O<sub>24</sub>](H<sub>2</sub>O)<sub>10</sub></b> |                             | <b>SrH<sub>4</sub>[Al<sub>6</sub>Si<sub>6</sub>O<sub>24</sub>](H<sub>2</sub>O)<sub>10</sub></b> |                             |
|-------------------------------------------------------------------------------------------------|-----------------------------|-------------------------------------------------------------------------------------------------|-----------------------------|
| Cs-O <sub>Framework</sub> : 4.25                                                                | Cs-O <sub>water</sub> :4.29 | Sr-O <sub>Framework</sub> :4.83                                                                 | Sr-O <sub>water</sub> :2.49 |
| Cs-O <sub>Framework</sub> :4.84                                                                 | Cs-O <sub>water</sub> :2.82 | Sr-O <sub>Framework</sub> : 5.17                                                                | Sr-O <sub>water</sub> :2.57 |
| Cs-O <sub>Framework</sub> :3.31                                                                 | Cs-O <sub>water</sub> :3.86 | Sr-O <sub>Framework</sub> : 3.58                                                                | Sr-O <sub>water</sub> :3.97 |
| Cs-O <sub>Framework</sub> : 3.00                                                                | Cs-O <sub>water</sub> :5.43 | Sr-O <sub>Framework</sub> : 2.57                                                                | Sr-O <sub>water</sub> :4.59 |
| Cs-O <sub>Framework</sub> : 3.20                                                                | Cs-O <sub>water</sub> :7.63 | Sr-O <sub>Framework</sub> : 3.36                                                                | Sr-O <sub>water</sub> :5.68 |
| Cs-O <sub>Framework</sub> : 4.65                                                                | Cs-O <sub>water</sub> :2.95 | Sr-O <sub>Framework</sub> : 5.27                                                                | Sr-O <sub>water</sub> :7.84 |
|                                                                                                 | Cs-O <sub>water</sub> :3.00 |                                                                                                 | Sr-O <sub>water</sub> :2.57 |
|                                                                                                 | Cs-O <sub>water</sub> :6.89 |                                                                                                 | Sr-O <sub>water</sub> :6.21 |
|                                                                                                 | Cs-O <sub>water</sub> :6.06 |                                                                                                 | Sr-O <sub>water</sub> :5.52 |
|                                                                                                 | Cs-O <sub>water</sub> :5.05 |                                                                                                 | Sr-O <sub>water</sub> :6.55 |
| <b>CsH<sub>5</sub>[Al<sub>6</sub>Si<sub>6</sub>O<sub>24</sub>](H<sub>2</sub>O)<sub>11</sub></b> |                             | <b>SrH<sub>4</sub>[Al<sub>6</sub>Si<sub>6</sub>O<sub>24</sub>](H<sub>2</sub>O)<sub>11</sub></b> |                             |
| Cs-O <sub>Framework</sub> : 2.97                                                                | Cs-O <sub>water</sub> :2.97 | Sr-O <sub>Framework</sub> :4.73                                                                 | Sr-O <sub>water</sub> :2.62 |
| Cs-O <sub>Framework</sub> :3.36                                                                 | Cs-O <sub>water</sub> :2.98 | Sr-O <sub>Framework</sub> : 4.67                                                                | Sr-O <sub>water</sub> :2.52 |
| Cs-O <sub>Framework</sub> :5.07                                                                 | Cs-O <sub>water</sub> :4.44 | Sr-O <sub>Framework</sub> : 3.15                                                                | Sr-O <sub>water</sub> :3.98 |
| Cs-O <sub>Framework</sub> : 4.41                                                                | Cs-O <sub>water</sub> :2.88 | Sr-O <sub>Framework</sub> : 2.57                                                                | Sr-O <sub>water</sub> :2.53 |
| Cs-O <sub>Framework</sub> : 4.87                                                                | Cs-O <sub>water</sub> :3.93 | Sr-O <sub>Framework</sub> : 3.42                                                                | Sr-O <sub>water</sub> :4.52 |
| Cs-O <sub>Framework</sub> : 3.30                                                                | Cs-O <sub>water</sub> :5.48 | Sr-O <sub>Framework</sub> : 5.46                                                                | Sr-O <sub>water</sub> :3.36 |
|                                                                                                 | Cs-O <sub>water</sub> :7.84 |                                                                                                 | Sr-O <sub>water</sub> :7.74 |
|                                                                                                 | Cs-O <sub>water</sub> :2.95 |                                                                                                 | Sr-O <sub>water</sub> :5.83 |
|                                                                                                 | Cs-O <sub>water</sub> :6.69 |                                                                                                 | Sr-O <sub>water</sub> :6.40 |
|                                                                                                 | Cs-O <sub>water</sub> :6.06 |                                                                                                 | Sr-O <sub>water</sub> :5.15 |
|                                                                                                 | Cs-O <sub>water</sub> :5.11 |                                                                                                 | Sr-O <sub>water</sub> :6.50 |

**Table S6.** Distances (in Å) for Cs<sup>+</sup> and Sr<sup>2+</sup> from the framework and H<sub>2</sub>O in H-type and Na-type sodalite.

| Ions             | H-type                           |                              | Na-type                          |                              |
|------------------|----------------------------------|------------------------------|----------------------------------|------------------------------|
| Cs <sup>+</sup>  | Cs-O <sub>Framework</sub> : 3.04 | Cs-O <sub>water</sub> : 2.85 | Cs-O <sub>Framework</sub> : 2.79 | Cs-O <sub>water</sub> : 2.82 |
|                  | Cs-O <sub>Framework</sub> : 3.11 | Cs-O <sub>water</sub> : 3.14 | Cs-O <sub>Framework</sub> : 2.88 | Cs-O <sub>water</sub> : 2.83 |
|                  | Cs-O <sub>Framework</sub> : 3.14 | Cs-O <sub>water</sub> : 3.15 | Cs-O <sub>Framework</sub> : 2.93 | Cs-O <sub>water</sub> : 2.86 |
|                  | Cs-O <sub>Framework</sub> : 3.40 |                              | Cs-O <sub>Framework</sub> : 3.23 |                              |
|                  | Cs-O <sub>Framework</sub> : 3.53 |                              | Cs-O <sub>Framework</sub> : 3.23 |                              |
|                  | Cs-O <sub>Framework</sub> : 3.77 |                              | Cs-O <sub>Framework</sub> : 3.45 |                              |
| Sr <sup>2+</sup> | Sr-O <sub>Framework</sub> : 2.57 | Sr-O <sub>water</sub> : 2.55 | Sr-O <sub>Framework</sub> : 2.40 | Sr-O <sub>water</sub> : 2.74 |
|                  | Sr-O <sub>Framework</sub> : 2.61 | Sr-O <sub>water</sub> : 3.22 | Sr-O <sub>Framework</sub> : 2.42 | Sr-O <sub>water</sub> : 2.85 |
|                  | Sr-O <sub>Framework</sub> : 2.18 | Sr-O <sub>water</sub> : 3.39 | Sr-O <sub>Framework</sub> : 2.46 | Sr-O <sub>water</sub> : 2.88 |
|                  | Sr-O <sub>Framework</sub> : 3.12 |                              | Sr-O <sub>Framework</sub> : 2.94 |                              |
|                  | Sr-O <sub>Framework</sub> : 3.15 |                              | Sr-O <sub>Framework</sub> : 2.97 |                              |
|                  | Sr-O <sub>Framework</sub> : 3.56 |                              | Sr-O <sub>Framework</sub> : 2.98 |                              |

**Table S7.** Distances (in Å) for Na atoms from the framework and H<sub>2</sub>O for the immobilization of Cs<sup>+</sup> and Sr<sup>2+</sup> in Na-type sodalite.

| Ions                              | Distance (Na-O)                   |                                   | Distance(Na-O)                    |                                   |                              |
|-----------------------------------|-----------------------------------|-----------------------------------|-----------------------------------|-----------------------------------|------------------------------|
|                                   | (Å)                               |                                   | (Å)                               |                                   |                              |
| Cs <sup>+</sup>                   | Na1-O <sub>Framework</sub> : 2.29 | Na1-O <sub>water</sub> :2.49      | Na2-O <sub>Framework</sub> : 2.29 | Na2-O <sub>water</sub> :2.33      |                              |
|                                   | Na1-O <sub>Framework</sub> : 2.35 | Na1-O <sub>water</sub> :2.59      | Na2-O <sub>Framework</sub> : 2.51 | Na2-O <sub>water</sub> :2.46      |                              |
|                                   | Na1-O <sub>Framework</sub> : 2.45 | Na1-O <sub>water</sub> :2.60      | Na2-O <sub>Framework</sub> : 2.73 | Na2-O <sub>water</sub> :2.46      |                              |
|                                   | Na1-O <sub>Framework</sub> : 3.09 | Na1-O <sub>water</sub> :4.75      | Na2-O <sub>Framework</sub> : 3.03 | Na2-O <sub>water</sub> :4.55      |                              |
|                                   | Na1-O <sub>Framework</sub> : 3.19 |                                   | Na2-O <sub>Framework</sub> : 3.51 |                                   |                              |
|                                   | Na1-O <sub>Framework</sub> : 3.19 |                                   | Na2-O <sub>Framework</sub> : 3.47 |                                   |                              |
|                                   | Na3-O <sub>Framework</sub> : 2.32 | Na3-O <sub>water</sub> :2.54      |                                   |                                   |                              |
|                                   | Na3-O <sub>Framework</sub> : 2.33 | Na3-O <sub>water</sub> :2.57      |                                   |                                   |                              |
|                                   | Na3-O <sub>Framework</sub> : 2.36 | Na3-O <sub>water</sub> :2.65      |                                   |                                   |                              |
|                                   | Na3-O <sub>Framework</sub> : 3.03 | Na3-O <sub>water</sub> :4.74      |                                   |                                   |                              |
|                                   | Na3-O <sub>Framework</sub> : 3.12 |                                   |                                   |                                   |                              |
|                                   | Na3-O <sub>Framework</sub> : 3.34 |                                   |                                   |                                   |                              |
|                                   | Sr <sup>2+</sup>                  | Na1-O <sub>Framework</sub> : 2.34 | Na1-O <sub>water</sub> :2.39      | Na2-O <sub>Framework</sub> :2.41  | Na2-O <sub>water</sub> :2.41 |
|                                   |                                   | Na1-O <sub>Framework</sub> : 2.41 | Na1-O <sub>water</sub> :2.41      | Na2-O <sub>Framework</sub> : 2.53 | Na2-O <sub>water</sub> :2.43 |
|                                   |                                   | Na1-O <sub>Framework</sub> : 2.63 | Na1-O <sub>water</sub> :2.55      | Na2-O <sub>Framework</sub> : 2.59 | Na2-O <sub>water</sub> :2.48 |
| Na1-O <sub>Framework</sub> : 3.03 |                                   | Na1-O <sub>water</sub> :3.90      | Na2-O <sub>Framework</sub> : 3.32 | Na2-O <sub>water</sub> :4.22      |                              |
| Na1-O <sub>Framework</sub> :3.29  |                                   |                                   | Na2-O <sub>Framework</sub> : 3.35 |                                   |                              |
| Na1-O <sub>Framework</sub> : 3.49 |                                   |                                   | Na2-O <sub>Framework</sub> : 3.40 |                                   |                              |

**Table S8.** Gibbs free energies  $G_T$  (eV) for  $\text{Cs}^+$  and  $\text{Sr}^{2+}$  ions adsorbed in the cage of  $\text{H}_6[\text{Al}_6\text{Si}_6\text{O}_{24}](\text{H}_2\text{O})_n$  ( $n = 0-11$ ) in 0 K, 300 K, 600 K, 900 K, 1200 K, respectively.

| Ions             | $(\text{H}_2\text{O})_n$ | $G_T$ | $G_T$ | $G_T$ | $G_T$ | $G_T$ |
|------------------|--------------------------|-------|-------|-------|-------|-------|
|                  |                          | 0 K   | 300K  | 600K  | 900K  | 1200K |
| $\text{Cs}^+$    | $n = 0$                  | -0.37 | -0.36 | -0.45 | -0.62 | -0.86 |
|                  | $n = 1$                  | -0.60 | -0.59 | -0.54 | -0.51 | -0.48 |
|                  | $n = 2$                  | -1.32 | -1.41 | -1.50 | -1.61 | -1.74 |
|                  | $n = 3$                  | -1.57 | -1.54 | -1.50 | -1.47 | -1.48 |
|                  | $n = 4$                  | -1.72 | -1.64 | -1.51 | -1.38 | -1.27 |
|                  | $n = 5$                  | -0.97 | -0.76 | -0.42 | -0.07 | 0.25  |
|                  | $n = 6$                  | -0.55 | -0.49 | -0.37 | -0.25 | -0.15 |
|                  | $n = 7$                  | -0.31 | -0.06 | 0.33  | 0.72  | 1.10  |
|                  | $n = 8$                  | -1.04 | -1.03 | -1.02 | -1.04 | -1.09 |
|                  | $n = 9$                  | -0.95 | -0.86 | -0.71 | -0.59 | -0.52 |
|                  | $n = 10$                 | -0.48 | -0.37 | -0.19 | -0.02 | 0.13  |
| $n = 11$         | 0.16                     | 0.33  | 0.44  | 0.49  | 0.48  |       |
| $\text{Sr}^{2+}$ | $n = 0$                  | 0.27  | 0.22  | 0.04  | -0.25 | -0.60 |
|                  | $n = 1$                  | 0.27  | 0.32  | 0.35  | 0.33  | 0.27  |
|                  | $n = 2$                  | -0.91 | -0.95 | -1.09 | -1.29 | -1.53 |
|                  | $n = 3$                  | -1.17 | -1.16 | -1.20 | -1.29 | -1.41 |

|          |       |       |       |       |       |
|----------|-------|-------|-------|-------|-------|
| $n = 4$  | -1.68 | -1.71 | -1.78 | -1.91 | -2.08 |
| $n = 5$  | -1.23 | -1.09 | -0.90 | -0.72 | -0.56 |
| $n = 6$  | -0.54 | -0.50 | -0.43 | -0.38 | -0.35 |
| $n = 7$  | 0.07  | 0.24  | 0.42  | 0.56  | 0.67  |
| $n = 8$  | -0.67 | -0.56 | -0.45 | -0.38 | -0.34 |
| $n = 9$  | -1.24 | -1.20 | -1.21 | -1.29 | -1.41 |
| $n = 10$ | -1.04 | -0.95 | -0.87 | -0.83 | -0.83 |
| $n = 11$ | -0.01 | 0.03  | -0.02 | -0.16 | -0.36 |

---

**Table S9.** The diffusion energy barrier for  $\text{CsH}_5[\text{Al}_6\text{Si}_6\text{O}_{24}](\text{H}_2\text{O})_n$  and  $\text{SrH}_4[\text{Al}_6\text{Si}_6\text{O}_{24}](\text{H}_2\text{O})_n$  ( $n = 0-4$ ) along the reaction coordinate, respectively.

| <b>Ions</b>            | <b>(H<sub>2</sub>O)<sub>0</sub></b> | <b>(H<sub>2</sub>O)<sub>1</sub></b> | <b>(H<sub>2</sub>O)<sub>2</sub></b> | <b>(H<sub>2</sub>O)<sub>3</sub></b> | <b>(H<sub>2</sub>O)<sub>4</sub></b> |
|------------------------|-------------------------------------|-------------------------------------|-------------------------------------|-------------------------------------|-------------------------------------|
| <b>Cs<sup>+</sup></b>  | 0.00                                | 0.00                                | 0.00                                | 0.00                                | 0.00                                |
|                        | 0.26                                | 0.27                                | 0.41                                | 0.36                                | 0.40                                |
|                        | 1.23                                | 1.26                                | 1.74                                | 1.58                                | 1.71                                |
|                        | 2.78                                | 2.84                                | 3.59                                | 3.40                                | 3.65                                |
|                        | 4.16                                | 4.20                                | 4.79                                | 4.90                                | 5.17                                |
|                        | 4.27                                | 4.41                                | 4.84                                | 5.17                                | 5.26                                |
|                        | 4.08                                | 4.22                                | 4.60                                | 4.93                                | 5.05                                |
|                        | 3.67                                | 3.81                                | 4.14                                | 4.46                                | 4.64                                |
|                        | 3.12                                | 3.26                                | 3.54                                | 3.82                                | 4.08                                |
|                        | 2.49                                | 2.62                                | 2.84                                | 3.10                                | 3.46                                |
|                        | 1.23                                | 1.35                                | 1.46                                | 1.64                                | 1.78                                |
|                        | 0.35                                | 0.43                                | 0.47                                | 0.58                                | 1.08                                |
|                        | 0.01                                | 0.05                                | 0.06                                | 0.13                                | 0.94                                |
|                        | 0.00                                | 0.04                                | 0.03                                | 0.09                                | 0.98                                |
| <b>Sr<sup>2+</sup></b> | 0                                   | 0                                   | 0                                   | 0                                   | 0                                   |
|                        | 0.07                                | 0.06                                | 0.07                                | 0.08                                | 0.04                                |

|      |      |      |      |      |
|------|------|------|------|------|
| 0.25 | 0.24 | 0.27 | 0.29 | 0.20 |
| 0.50 | 0.50 | 0.57 | 0.63 | 0.24 |
| 0.76 | 0.80 | 0.94 | 1.04 | 0.61 |
| 0.99 | 1.09 | 1.31 | 1.43 | 1.05 |
| 1.16 | 1.33 | 1.63 | 1.75 | 1.48 |
| 1.23 | 1.48 | 1.83 | 1.94 | 1.84 |
| 1.24 | 1.54 | 1.91 | 1.98 | 2.73 |
| 1.15 | 1.52 | 1.87 | 1.90 | 2.70 |
| 1.03 | 1.41 | 1.74 | 1.74 | 2.46 |
| 0.89 | 1.26 | 1.53 | 1.54 | 2.44 |
| 0.78 | 1.12 | 1.32 | 1.35 | 2.16 |
| 0.75 | 1.05 | 1.16 | 1.22 | 1.94 |

---

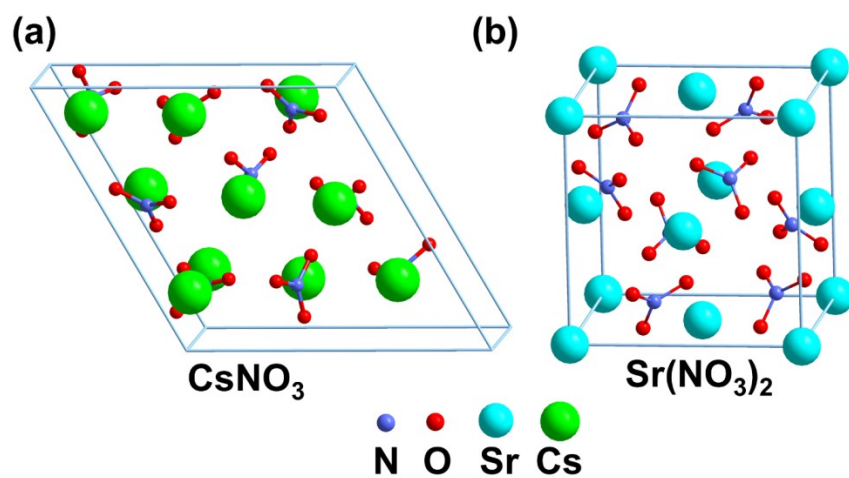

**Figure S1.** The crystalline structures of  $\text{CsNO}_3$  and  $\text{Sr}(\text{NO}_3)_2$ .



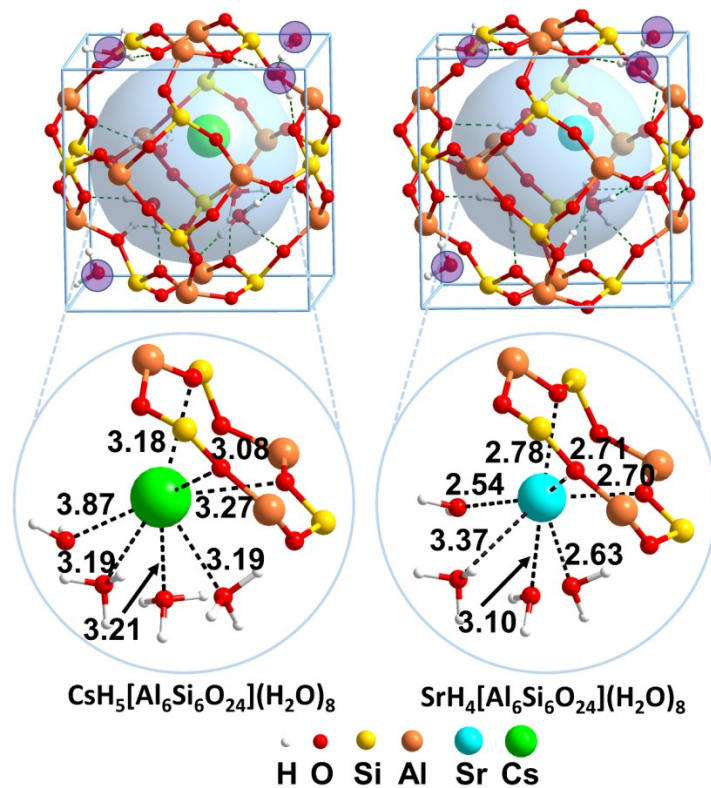

**Figure S2.** The structural details of  $\text{CsH}_5[\text{Si}_6\text{Al}_6\text{O}_{24}](\text{H}_2\text{O})_8$  and  $\text{SrH}_4[\text{Si}_6\text{Al}_6\text{O}_{24}](\text{H}_2\text{O})_8$  with four water molecules in the cage and four molecules out of the cage. Due the visualization, some hydrogen bonds are showed as chemical bonds.

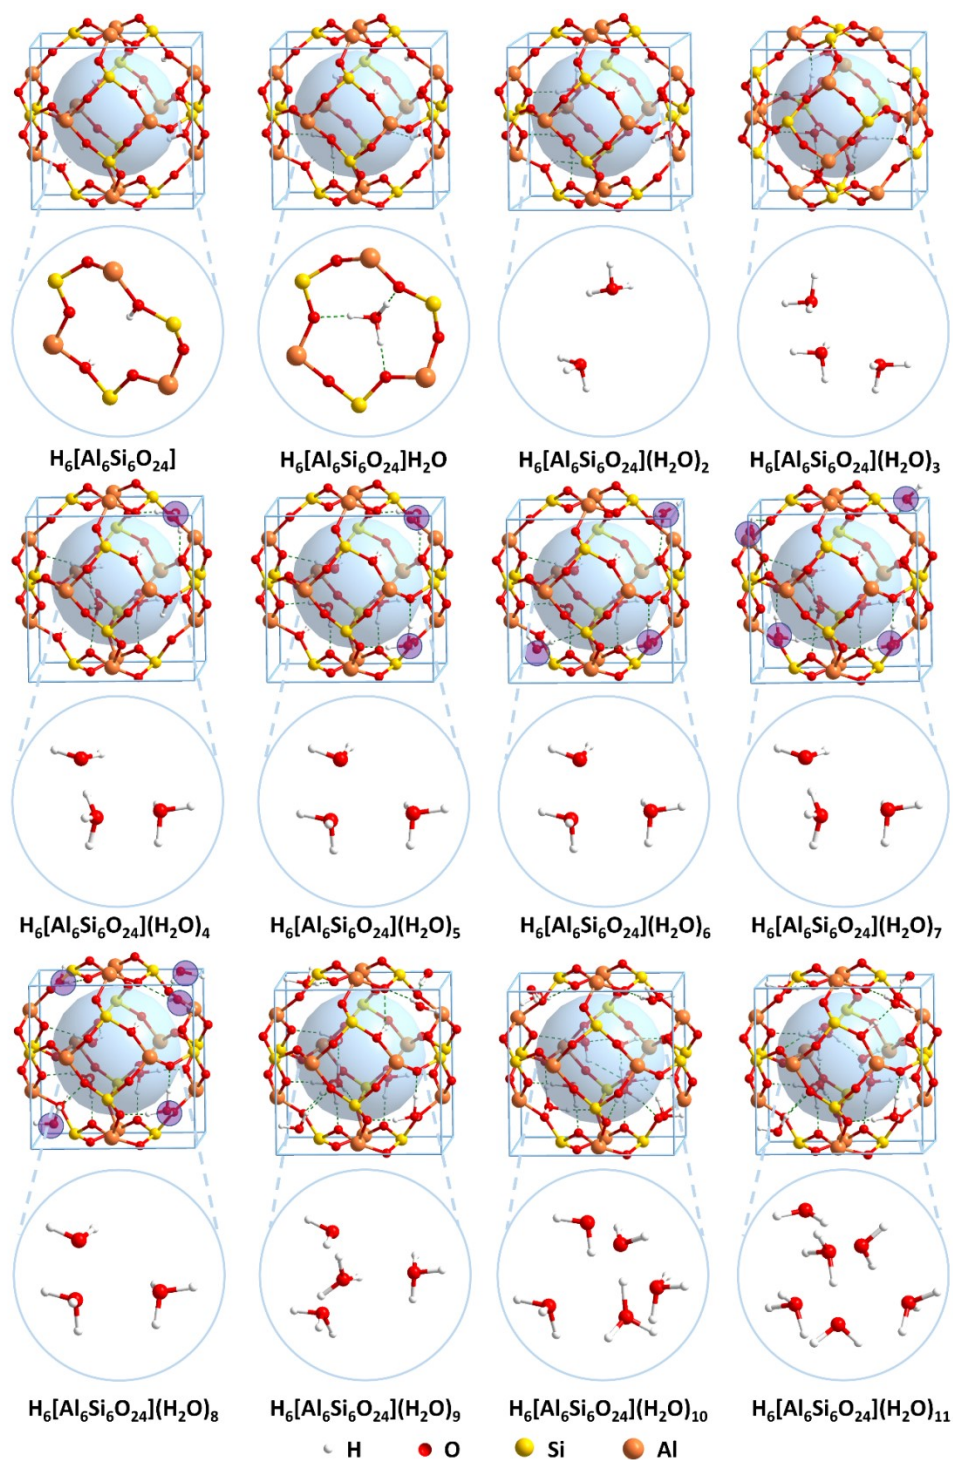

**Figure S3.** Structures for  $\text{H}_6[\text{Al}_6\text{Si}_6\text{O}_{24}](\text{H}_2\text{O})_n$  ( $n=0-11$ ). The pale blue balls indicate the cage of the sodalite. The  $\text{H}_2\text{O}$  molecules adsorbed outside the cage of sodalite was highlighted in pale purple. Distances are given in Å.

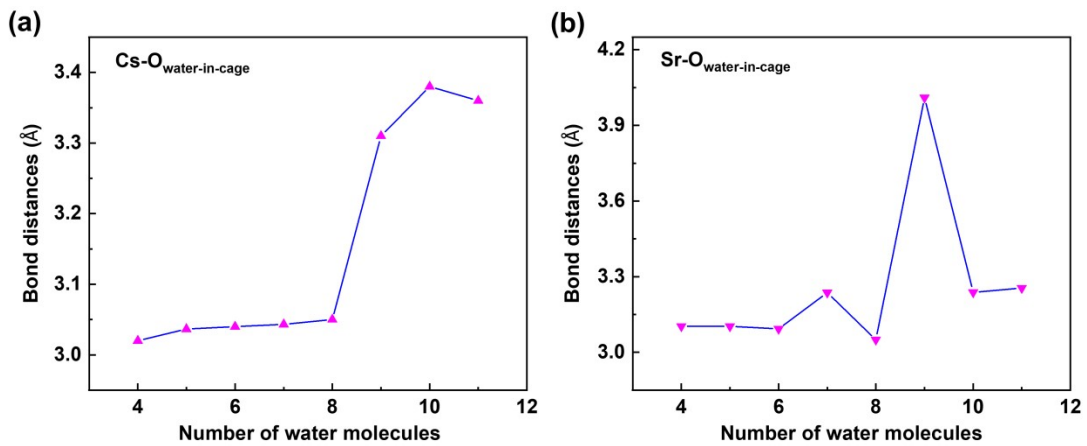

**Figure S4.** Average bond distances of M-O<sub>water-in-cage</sub> vs number of water molecules for (a) CsH<sub>5</sub>[Al<sub>6</sub>Si<sub>6</sub>O<sub>24</sub>] and (b) SrH<sub>4</sub>[Al<sub>6</sub>Si<sub>6</sub>O<sub>24</sub>].

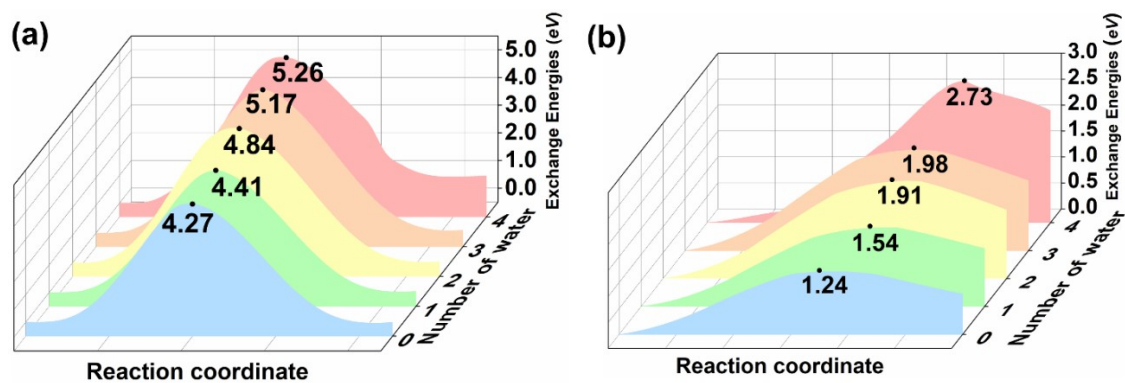

**Figure S5** The diffusion Gibbs free energy barrier for  $\text{CsH}_5[\text{Al}_6\text{Si}_6\text{O}_{24}](\text{H}_2\text{O})_n$  and (2)  $\text{SrH}_4[\text{Al}_6\text{Si}_6\text{O}_{24}](\text{H}_2\text{O})_n$  ( $n = 0-4$ ). The associated data are listed in **Table S9** in the Supporting Information.
